# Supplementary material for: Dual-modal molecular imaging and therapeutic evaluation of coronary microvascular dysfunction using indocyanine green-doped targeted microbubbles
Source: Royal Society of Chemistry journal article supplement (doi:10.1039/d2bm02155b), 2023-01-01
Supplement: d2bm02155b1.pdf [file d2bm02155b1.pdf]

## Dual-Model Molecular Imaging and Therapeutic Evaluation of Coronary Microvascular Dysfunction using Indocyanine Green- Doped Targeted Microbubbles

Alimina Awen, ‡<sup>a</sup> Dehong Hu, ‡<sup>b</sup> Duyang Gao,<sup>\*b</sup> Zihang Wang,<sup>a</sup> Yayun Wu,<sup>b</sup> Hairong  
Zheng,<sup>b</sup> Lina Guan,<sup>a</sup> Yuming Mu,<sup>\*a</sup> Zonghai Sheng <sup>\*b</sup>

<sup>a</sup> Department of Echocardiography, First Affiliated Hospital of Xinjiang Medical  
University, Xinjiang Key Laboratory of Ultrasound Medicine, Urumqi, Xinjiang,  
830011, P. R. China

<sup>b</sup> Paul C. Lauterbur Research Center for Biomedical Imaging, CAS Key Laboratory of  
Health Informatics, Shenzhen Key Laboratory of Ultrasound Imaging and Therapy,  
Institute of Biomedical and Health Engineering, Shenzhen Institute of Advanced  
Technology, Chinese Academy of Sciences, Shenzhen 518055, Guangdong, P. R.  
China

\* Corresponding author.

E-mail address: dy.gao@siat.ac.cn (D. Gao), mym1234@126.com (Y. Mu),  
zh.sheng@siat.ac.cn (Z. Sheng)

‡Alimina Awen and Dehong Hu contributed equally to this work.

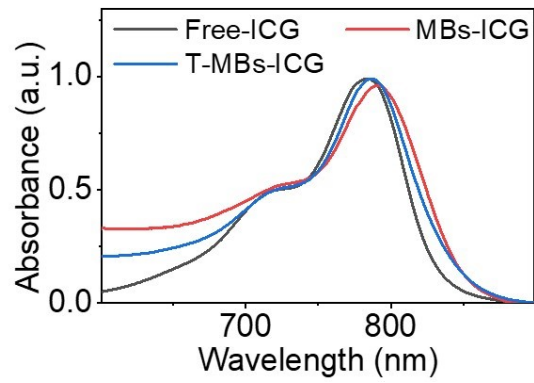

**Figure S1.** Normalized UV-Vis-NIR absorption spectra of free ICG, MBs-ICG and T-MBs-ICG solutions.

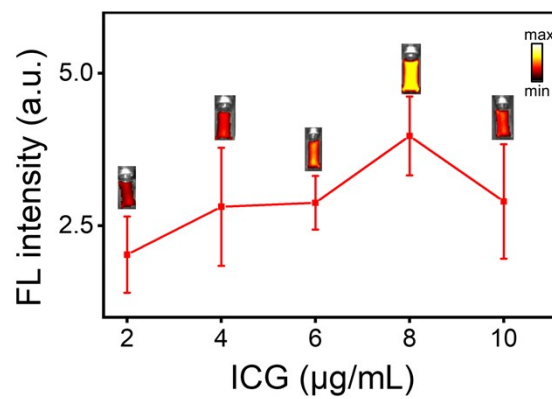

**Figure S2.** Fluorescence (FL) intensity of T-MBs-ICG with ICG concentration from 2 to 10  $\mu\text{g/mL}$ . The inset is fluorescence images of the corresponding T-MBs-ICG solutions.

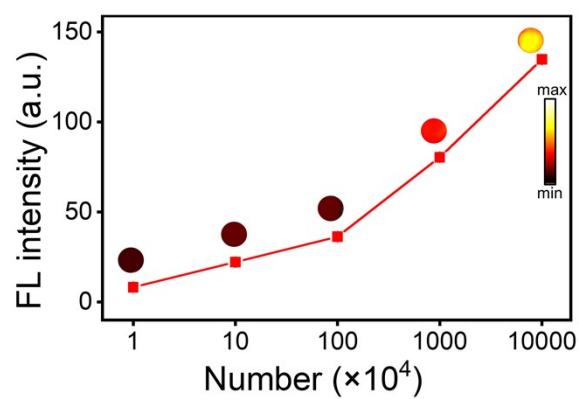

**Figure S3.** Fluorescence (FL) intensity of the T-MBs-ICG microbubbles (ICG = 8  $\mu\text{g}/\text{mL}$ ) with different concentration, Inset shows NIR FL images of the T-MBs-ICG microbubbles solution.

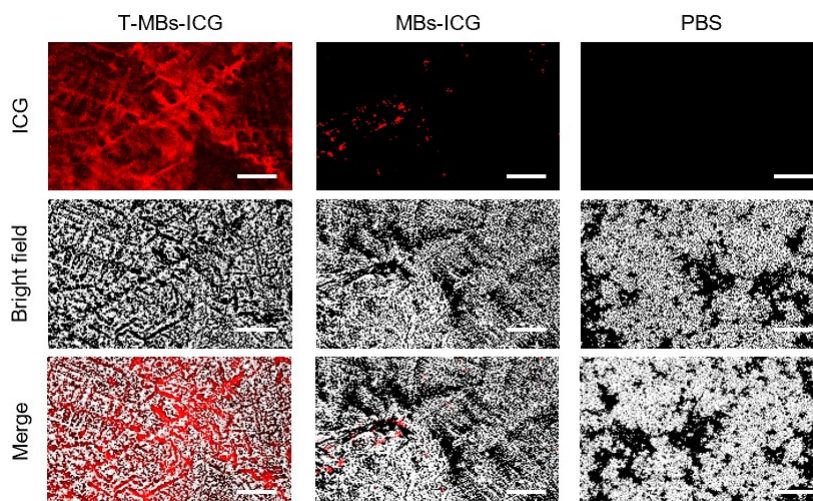

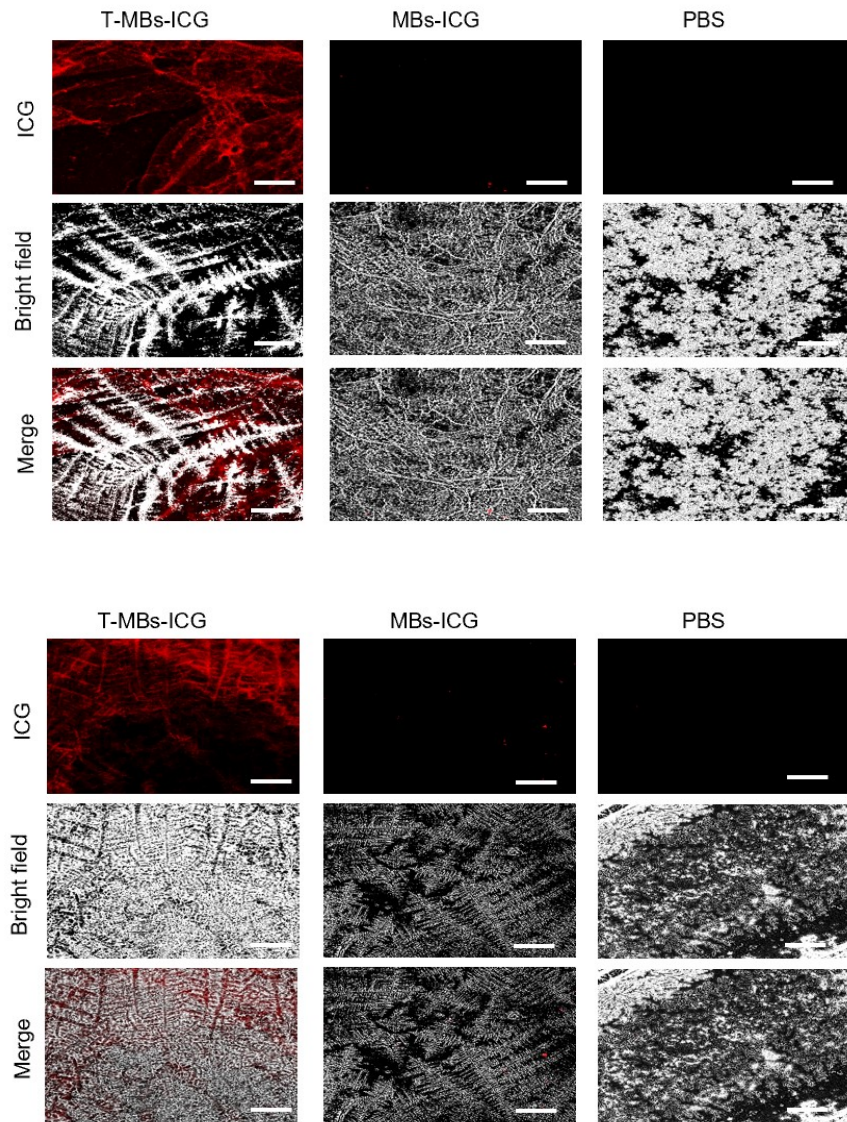

**Figure S4.** Three repeated fluorescence microscopy images of fibrin clots incubated with T-MBs-ICG, MBs-ICG, and PBS, respectively. Scale bars: 100  $\mu\text{m}$ .

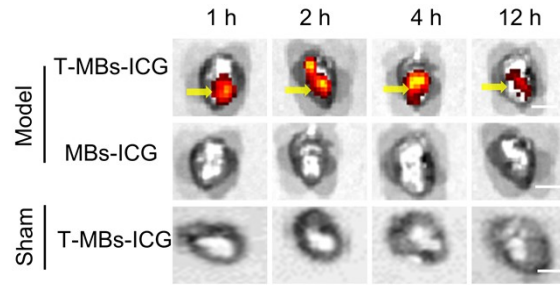

**Figure S5.** *In vitro* fluorescence images of the isolated heart at 1, 2, 4, and 12 h, The yellow arrows represent the fibrin formation area. Imaging condition: Ex: 745 nm; Em: 840 nm.

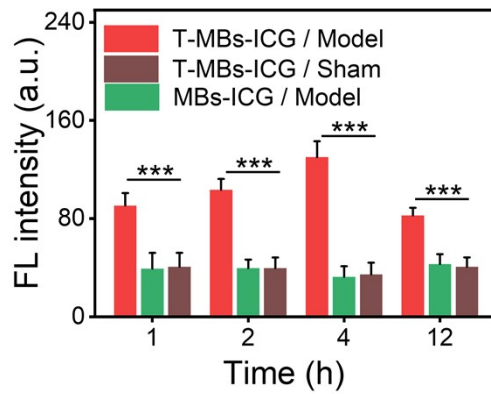

**Figure S6.** Quantitative analysis of NIR fluorescence imaging of isolated heart tissues at different time points (\*\*\*) $P < 0.001$ ).

**Table S1.** Comparison of different imaging modalities for CMD diagnostics.

| Modality | Advantages                                                        | Disadvantages                       | References                                  |
|----------|-------------------------------------------------------------------|-------------------------------------|---------------------------------------------|
| PET      | High-sensitivity, good reproducibility, extensive prognostic data | radiation exposure, expensive       | J. Med. Chem., 2022, 65, 497-506            |
| MRI      | no radiation exposure, excellent spatial resolution               | time consuming, expensive           | JACC Cardiovasc. Imaging, 2020, 13, 140-155 |
| CT       | validated against invasive measurements                           | radiation exposure, low sensitivity | J. Clin. Med., 2021, 10, 1848               |
| US       | inexpensive, high feasibility, deep tissue resolution             | operator-dependent, low contrast    | Front. Cardiovasc. Med., 2022, 9, 899099.   |
| FI       | high sensitivity, high-contrast, low cost                         | low tissue resolution               | J. Biophotonics, 2022, 15, e202200142       |
| US&FI    | high sensitivity, high contrast, deep tissue resolution           | lack dual-modal imaging instrument  | This work                                   |

Note: PET: Positron emission tomography; MRI: Magnetic resonance imaging; CT: Computed tomography; US: Ultrasound Imaging; FI: Fluorescence Imaging.
